# Supplementary material
Source: PubMed Central journal article supplement (PMC9938137)
Supplement: 42003_2023_4555_MOESM2_ESM.pdf [file 42003_2023_4555_MOESM2_ESM.pdf]

## Description of Additional Supplementary Files

**File name:** Supplementary Data 1

**Description:** The source data behind the graphs in the paper
